# Supplementary material for: A high-density genetic map of Arachis duranensis, a diploid ancestor of cultivated peanut
Source: PubMed Central journal article supplement (PMC3542255; doi:10.1186/1471-2164-13-469), 2012-09-11

6A

7A

8A

9A

10A

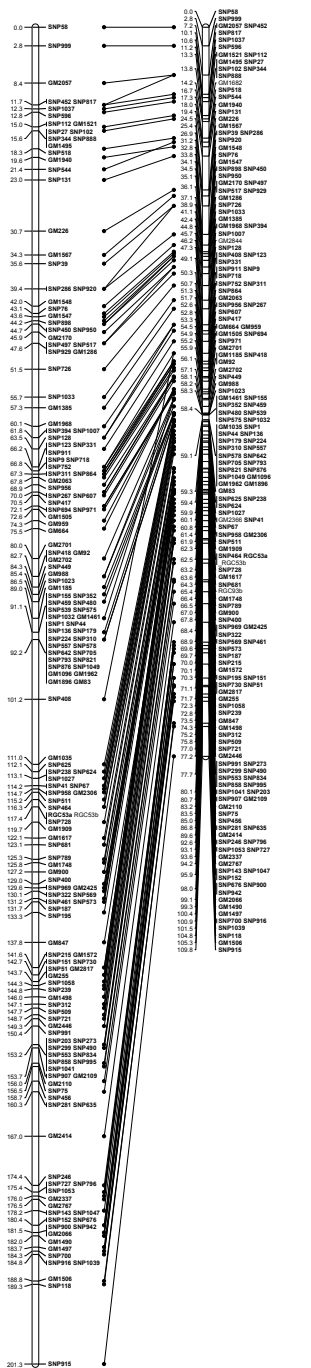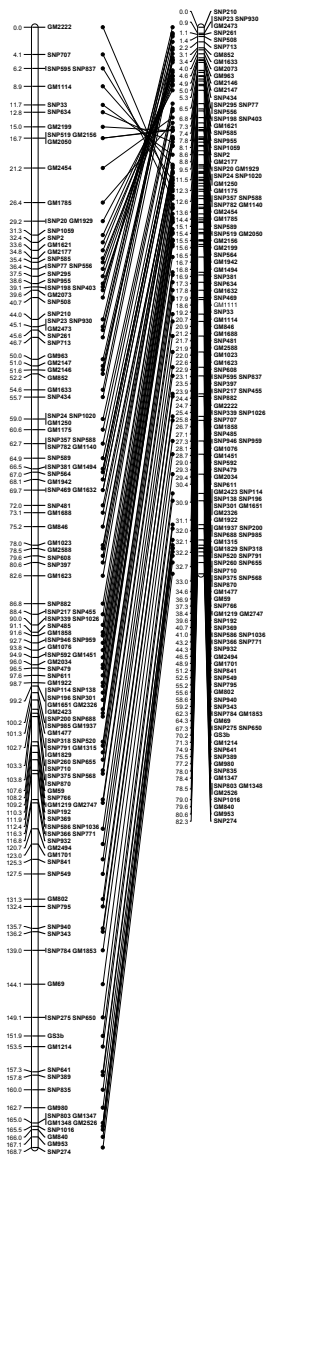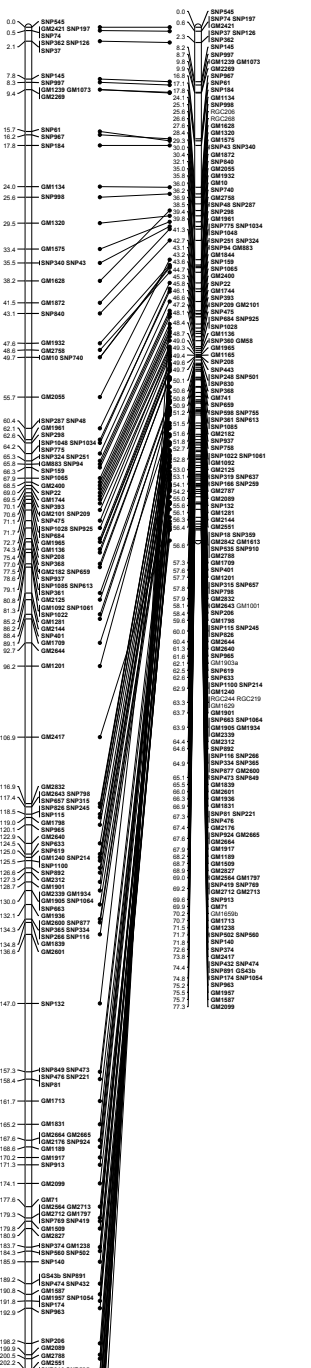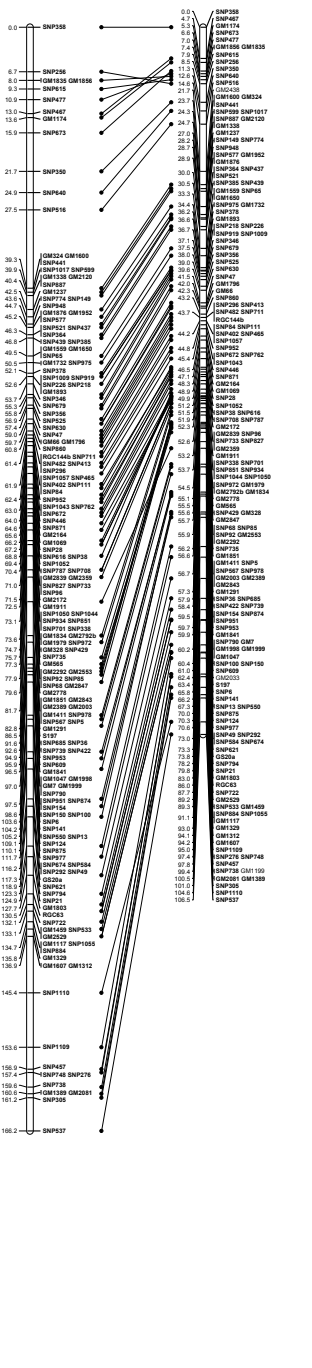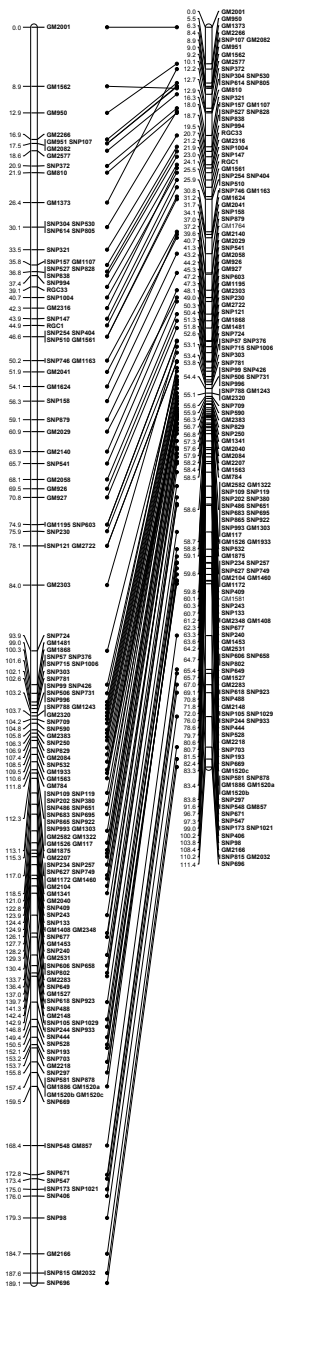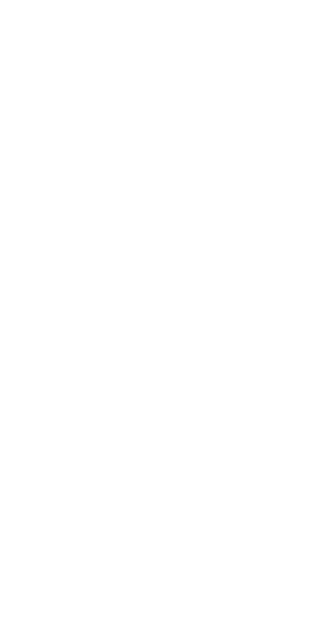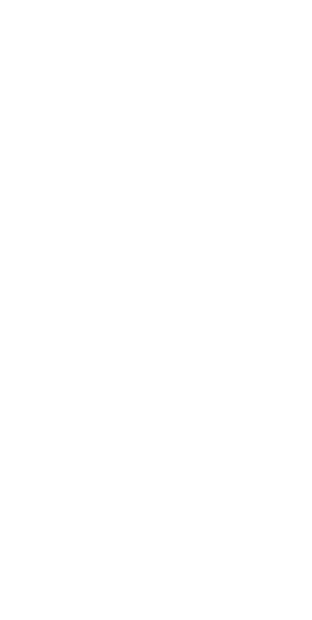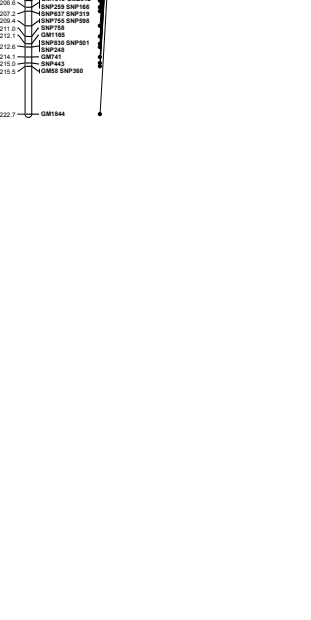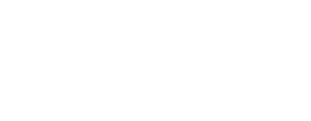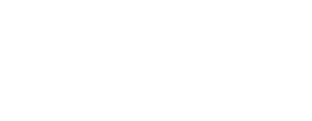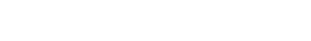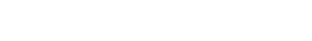

Supplement: 1471-2164-13-469-S2.pdf [file 1471-2164-13-469-S2.pdf]
